# Supplementary material for: Serological surveys to estimate cumulative incidence of SARS-CoV-2 infection in adults (Sero-MAss study), Massachusetts, July–August 2020: a mail-based cross-sectional study
Source: HighWire-hosted journal article supplement (doi:10.1136/bmjopen-2021-051157), 2021-08-01

## Supplemental Information

Serological surveys to estimate cumulative incidence of SARS-CoV-2 infection in adults (Sero-MAss study), Massachusetts, July-August 2020: a mail-based cross-sectional study

\* Correspondence to: [alover@umass.edu](mailto:alover@umass.edu)

School of Public Health and Health Sciences  
University of Massachusetts- Amherst  
715 North Pleasant Street  
Amherst, MA 01003-9304  
phone: 413-545-7426

**Supplemental Information****Supplemental Table 1: Comparison of characteristics of participants selected for randomization and those not selected for randomization, SARS-CoV-2 serosurvey, Massachusetts, USA, Jul-Aug 2020.**

|                                                         | <b>Primary Sampling Group<br/>(undergraduates)</b> |              | <b>Secondary sampling group<br/>(employees)</b> |               |
|---------------------------------------------------------|----------------------------------------------------|--------------|-------------------------------------------------|---------------|
|                                                         | Not<br>Randomized                                  | Randomized   | Not Randomized                                  | Randomized    |
| n                                                       | 869                                                | 752          | 2253                                            | 249           |
| <b>Age (mean (SD))</b>                                  | 20.64 (3.09)                                       | 20.18 (1.79) | 42.05 (13.53)                                   | 40.69 (13.88) |
| <b>Gender (%)</b>                                       |                                                    |              |                                                 |               |
| Unknown                                                 | 0 (0.0)                                            | 0 (0.0)      | 1 (0.0)                                         | 0 (0.0)       |
| Female                                                  | 525 (60.4)                                         | 453 (60.2)   | 1262 (56.0)                                     | 147 (59.0)    |
| Gender diverse                                          | 12 (1.4)                                           | 8 (1.1)      | 49 (2.2)                                        | 3 (1.2)       |
| Male                                                    | 332 (38.2)                                         | 291 (38.7)   | 941 (41.8)                                      | 99 (39.8)     |
| <b>Self-reported febrile illness since February (%)</b> |                                                    |              |                                                 |               |
| Unknown                                                 | 1 (0.1)                                            | 2 (0.3)      | 6 (0.3)                                         | 0 (0.0)       |
| No                                                      | 568 (65.4)                                         | 499 (66.4)   | 1658 (73.6)                                     | 189 (75.9)    |
| Not sure                                                | 75 (8.6)                                           | 57 (7.6)     | 154 (6.8)                                       | 16 (6.4)      |
| Yes                                                     | 225 (25.9)                                         | 194 (25.8)   | 435 (19.3)                                      | 44 (17.7)     |
| <b>Education (%)</b>                                    |                                                    |              |                                                 |               |
| Unknown                                                 | 4 (0.5)                                            | 3 (0.4)      | 6 (0.3)                                         | 1 (0.4)       |
| BA/BS                                                   | 15 (1.7)                                           | 14 (1.9)     | 509 (22.6)                                      | 64 (25.7)     |
| High school / GED                                       | 90 (10.4)                                          | 108 (14.4)   | 46 (2.0)                                        | 2 (0.8)       |
| More than BA/BS                                         | 2 (0.2)                                            | 0 (0.0)      | 1528 (67.8)                                     | 166 (66.7)    |
| Prefer not to answer                                    | 1 (0.1)                                            | 0 (0.0)      | 13 (0.6)                                        | 1 (0.4)       |
| Some college                                            | 757 (87.1)                                         | 627 (83.4)   | 151 (6.7)                                       | 15 (6.0)      |
| <b>Response to, "I am afraid of COVID-19" (%)</b>       |                                                    |              |                                                 |               |
| Unknown                                                 | 1 (0.1)                                            | 2 (0.3)      | 2 (0.1)                                         | 0 (0.0)       |
| Neither agree nor disagree                              | 199 (22.9)                                         | 141 (18.8)   | 399 (17.7)                                      | 51 (20.5)     |
| Somewhat agree                                          | 390 (44.9)                                         | 374 (49.7)   | 1051 (46.6)                                     | 100 (40.2)    |
| Somewhat disagree                                       | 115 (13.2)                                         | 99 (13.2)    | 153 (6.8)                                       | 22 (8.8)      |
| Strongly agree                                          | 121 (13.9)                                         | 104 (13.8)   | 573 (25.4)                                      | 66 (26.5)     |
| Strongly disagree                                       | 43 (4.9)                                           | 32 (4.3)     | 75 (3.3)                                        | 10 (4.0)      |

Supplemental Table 2: Comparison of estimated seropositivity by sampling groups using alternative cutpoints for seropositivity, SARS-CoV-2 serosurvey, Massachusetts, USA, Jul-Aug 2020.

| Sampling Group                                 | Cutoff Value | Unadjusted Prevalence (%) | Adjusted Prevalence (%) (95% confidence interval) |
|------------------------------------------------|--------------|---------------------------|---------------------------------------------------|
| <b>Primary sampling group (undergraduates)</b> |              |                           |                                                   |
|                                                | 2.49         | 4.6                       | 5.3 (3.5 – 8.0)                                   |
|                                                |              |                           |                                                   |
|                                                | <b>2.0</b>   | 10.9                      | 11.6 (9.1 – 15.0)                                 |
|                                                | 2.1          | 8.7                       | 9.2 (6.9 – 12.3)                                  |
|                                                | 2.2          | 7.1                       | 7.6 (5.5 – 10.6)                                  |
|                                                | 2.3          | 5.9                       | 6.5 (4.5 – 9.3)                                   |
|                                                | 2.4          | 5.0                       | 5.6 (3.8 – 8.4)                                   |
|                                                | <b>2.5</b>   | 4.5                       | 5.1 (3.3 – 7.9)                                   |
|                                                | 2.6          | 4.0                       | 4.5 (2.8 – 7.1)                                   |
|                                                | 2.7          | 3.7                       | 4.3 (2.6 – 6.9)                                   |
|                                                | 2.8          | 3.3                       | 3.9 (2.3 – 6.5)                                   |
|                                                | 2.9          | 2.8                       | 3.5 (2.0 – 6.2)                                   |
|                                                | <b>3.0</b>   | 2.4                       | 3.3 (1.8 – 5.9)                                   |
| <b>Secondary sampling group (employees)</b>    |              |                           |                                                   |
|                                                | 2.49         | 3.4                       | 4.0 (2.2 – 7.4)                                   |
|                                                |              |                           |                                                   |
|                                                | <b>2.0</b>   | 7.5                       | 8.2 (5.3 – 12.7)                                  |
|                                                | 2.1          | 5.5                       | 6.0 (3.7 – 9.8)                                   |
|                                                | 2.2          | 4.8                       | 5.4 (3.2 – 9.2)                                   |
|                                                | 2.3          | 4.8                       | 5.4 (3.2 – 9.2)                                   |
|                                                | 2.4          | 3.8                       | 4.5 (2.5 – 8.0)                                   |
|                                                | <b>2.5</b>   | 3.4                       | 4.0 (2.2 – 7.4)                                   |
|                                                | 2.6          | 2.4                       | 3.0 (1.5 – 6.2)                                   |
|                                                | 2.7          | 2.1                       | 2.6 (1.2 – 5.7)                                   |
|                                                | 2.8          | 2.1                       | 2.6 (1.2 – 5.7)                                   |
|                                                | 2.9          | 1.4                       | 1.7 (0.7 – 4.6)                                   |
|                                                | <b>3.0</b>   | 1.0                       | 1.3 (0.4 – 4.0)                                   |

Supplemental Figure 1. Distributions of IgG lognormal optical density (OD) ratios, by subgroups, SARS-CoV-2, Massachusetts, USA, Jul-Aug 2020.

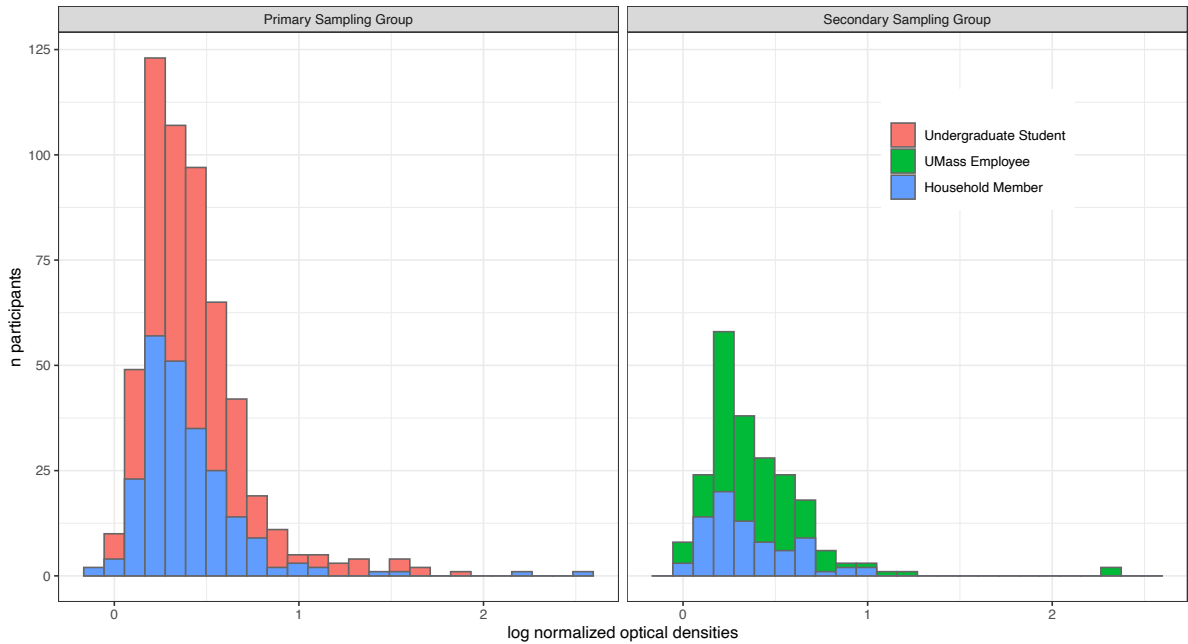

Supplement: bmjopen-2021-051157supp001_data_supplement.pdf [file bmjopen-2021-051157supp001_data_supplement.pdf]
